# Supplementary material
Source: PubMed Central journal article supplement (PMC6130966)
Supplement: supp_RA118.003678_137737_1_supp_170174_pc1bhg.pdf [file supp_RA118.003678_137737_1_supp_170174_pc1bhg.pdf]

## **Supporting information**

**The regulatory protein SnoN antagonizes Activin/Smad2 signaling and thereby promotes adipocyte differentiation and obesity in mice**

**Qingwei Zhu, Amanda Chang, Albert Xu, Kunxin Luo**

**Supplementary Figure 1-4**  
**Supplementary Table 1**

*SnoN promotes adipogenesis by antagonizing Activin signaling*

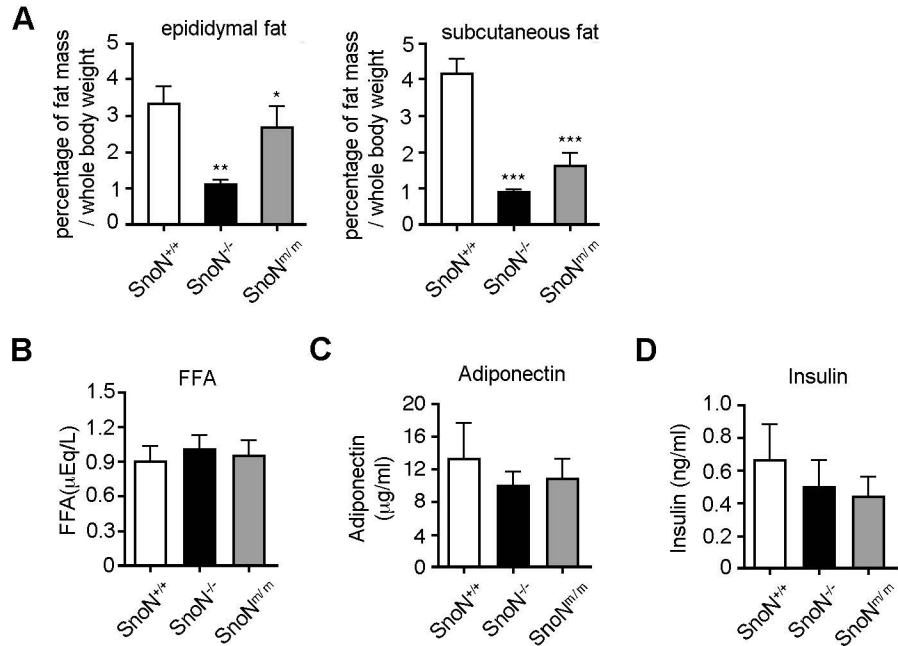

**Figure S1. Mice lacking *SnoN* are resistant to HFD-induced weight gain.**

(A) Mean weight of the epididymal adipose tissue (left) and subcutaneous adipose tissue (right) of *SnoN*<sup>+/+</sup>, *SnoN*<sup>-/-</sup> and *SnoN*<sup>mi/m</sup> male mice after 16 weeks on HFD. Values are expressed as percentage of body weight. Data are represented as means ± SD (\**p* < 0.05; \*\**p* < 0.01; \*\*\**p* < 0.001). (B-D) No significant difference was observed between HFD-fed WT and *SnoN* deficiency mice in the levels of plasma FFA (B), blood Adiponectin (C) and insulin (D). The serum/plasma was collected after 6 hr of fasting. Data are represented as means ± SD (*p* > 0.05).

*SnoN promotes adipogenesis by antagonizing Activin signaling*

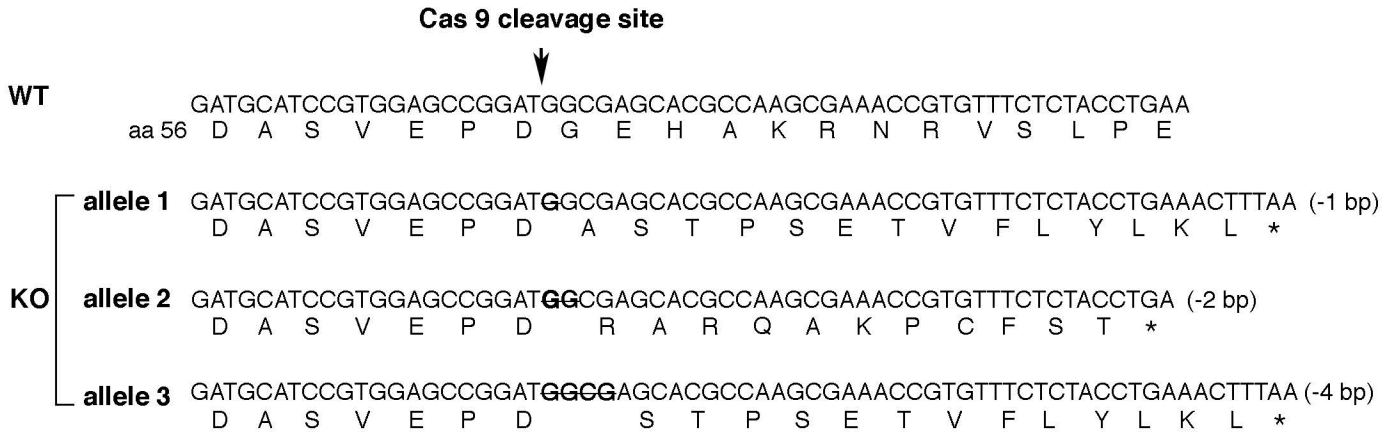

**Figure S2. Generation of *SnoN*<sup>-/-</sup> CH310T1/2 cells using CRISPR/Cas9.** 10 cloned DNA fragments containing regions of *snoN* gene targeted by the sgRNA were PCR-amplified from *SnoN*<sup>-/-</sup> cells and subjected to Sanger sequencing. The DNA and amino acid sequences for WT *SnoN* are shown on the top with the intended Cas9 cleavage site indicated by an arrowhead. Sequences of all three mutant *SnoN* alleles found in the 10 clones are listed. Deleted nucleotides (1, 2 and 4 nucleotides) are denoted by the strike-through bold letters, and the premature stop codons resulted from the frame-shift mutations are indicated by stars.

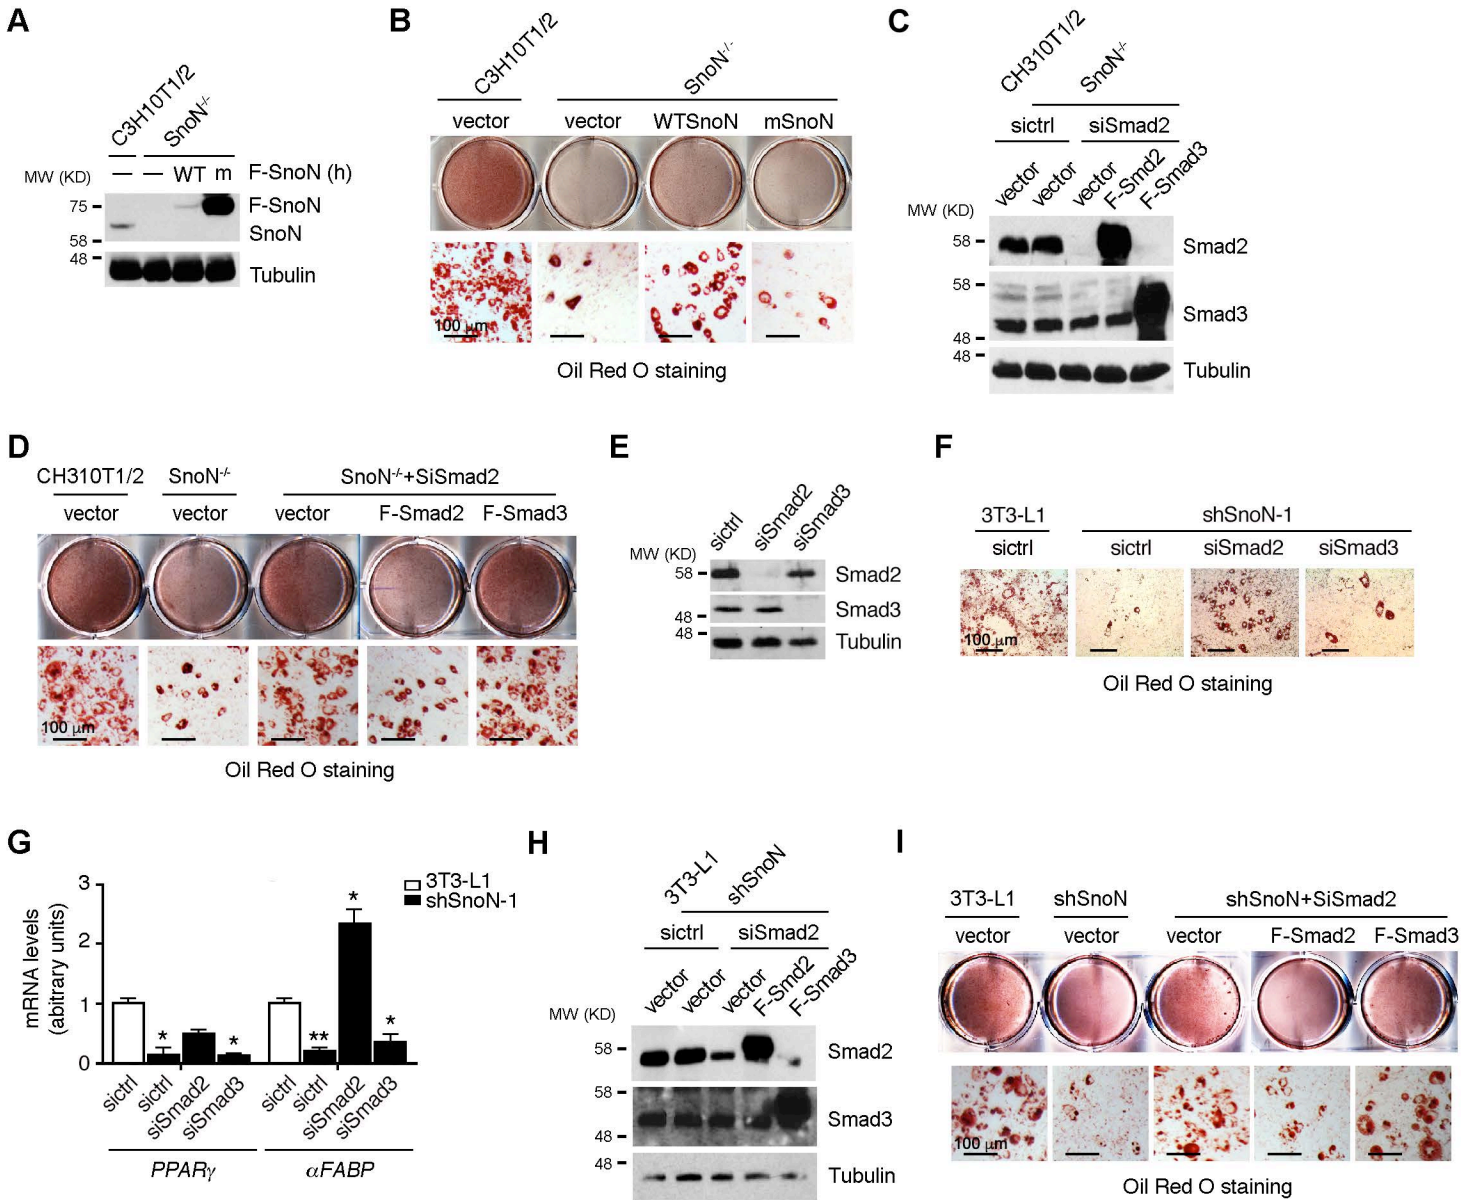

**Figure S3. Smad pathway is targeted by SnoN to regulate adipocyte differentiation in C3H10T1/2 and 3T3L1 cells.**

(A-B) Re-expression of WT SnoN (WTSnoN), but not Smad binding mutant SnoN (mSnoN) in C3H10T1/2 SnoN<sup>-/-</sup> cells by retroviral infection partially restored their ability to differentiate into adipocytes. SnoN protein levels were examined by western blotting with anti-SnoN (A). Tubulin was used as a loading control. Adipocyte differentiation was assessed by Oil Red O staining at day 7 (B). (C-D) Re-expression of human Flag-tagged Smad2 (F-Smad2), but not Smad3 (F-Smad3), in C3H10T1/2 SnoN<sup>-/-</sup>+SiSmad2 cells reversed the adipogenic differentiation. Smad2 and Smad3 expression levels in parental, SnoN<sup>-/-</sup>, SnoN<sup>-/-</sup>+siSmad2 and Smad2- or Smad3-rescue cell lines were examined by western blotting (C). Tubulin was used as a loading control. Cell differentiation was assessed by Oil Red O staining at day 7 (D). (E-I) Smad2 is targeted by SnoN to regulate adipocyte differentiation in 3T3L1 cells. Control siRNA (sictrl), siSmad2 or siSmad3 were transfected into 3T3L1 shSnoN-1 cells. The knockdown efficiency was examined by western blotting (E). Cell differentiation was assessed by Oil Red O staining (F) and the mRNA levels of PPAR $\gamma$  and  $\alpha$ FABP were quantified by qRT-PCR on day 7 (G). Rescue experiments by re-expressing F-Smad2 or F-Smad3 in 3T3-L1 shSnoN+siSmad2 cells were performed (H-I). Levels of Smad2 and 3 were examined by western blotting (H), and cell differentiation assessed by Oil Red O staining (I). Data in (G) are represented as means  $\pm$  SD (\*p < 0.05; \*\*p < 0.01; \*\*\*p < 0.001). Scale bars = 100  $\mu$ m.

*SnoN promotes adipogenesis by antagonizing Activin signaling*

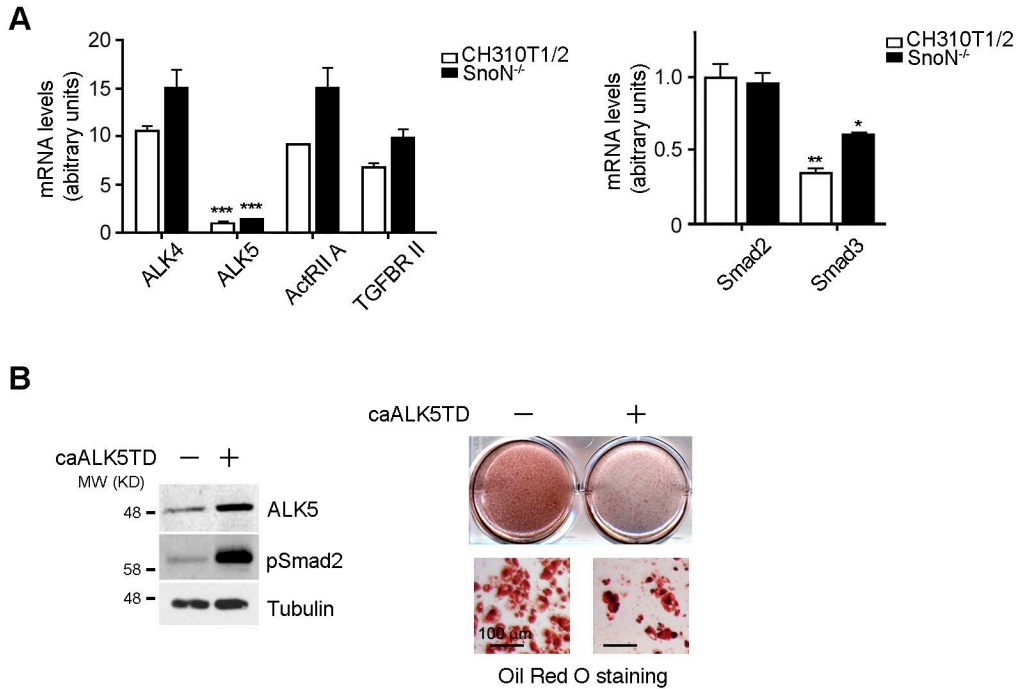

**Figure S4. The expression and activity of TGF $\beta$ /ALK5 pathway in C3H10T1/2 cells.**

(A) CH310T1/2 cells expressed lower levels of *ALK5* and *Smad3*. The mRNA levels of activin A receptors *ALK4* and *ActRIIA*, and TGF $\beta$  receptors *ALK5* and *TGFBR II*, as well as *Smad2* and *Smad3* in CH310T1/2 cells were examined by qRT-PCR. (B) Overexpression of a constitutively active form of ALK5 (caALK5TD) effectively inhibited adipogenic differentiation of CH310T1/2 cells. Protein levels of ALK5 and pSmad2 were examined by western blotting (left panels). Cell differentiation was assessed by Oil Red O staining at day 7 (right panels). Scale bar: 100  $\mu$ m.

**Table S1: qRT-PCR primer sequences**

| Gene                            | Forward                 | Reverse                 |
|---------------------------------|-------------------------|-------------------------|
| <i>PPAR<math>\gamma</math></i>  | TTGATTTCTCCAGCATTTTC    | TGATCGCACTTTGGTATT      |
| <i>C/EBP<math>\beta</math></i>  | GCAAGAGCCCGACAAG        | GGCTCGGGCAGCTGCTT       |
| <i><math>\alpha</math>FABP</i>  | TCACCATCACCTATGGACCCA   | TCCAGTTCGCACTCCTCCC     |
| <i>Adipsin</i>                  | CATGCTCGGCCCTACATGG     | CACAGAGTCGTCATCCGTCAC   |
| <i>nanog</i>                    | CTTTCACCTATTAAGGTGCTTGC | TGGCATCGGTTTCATCATGGTAC |
| <i>Acvr2a</i>                   | TTGACTTTCTCCCAAAGAATC   | TTCCTTAGCTTAGCAGCTCCA   |
| <i>Tgfr2</i>                    | CAACACCAGTGGGTTCATT     | GTGCGCCATTCAAATCCT      |
| <i>ALK4</i>                     | TGCTTGAGCTTTCTGTGCAT    | GAGAAGCAGCAGCACTCAGA    |
| <i>ALK5</i>                     | AGTCAGTCCGTTGGGTCTTC    | GTAAAACCCAGGCTCAACCA    |
| <i>Smad2</i>                    | ATGTCGTCCATCTTGCCATTC   | AACCGTCCTGTTTTCTTTAGCTT |
| <i>Smad3</i>                    | CACGCAGAACGTGAACACC     | GGCAGTAGATAACGTGAGGGA   |
| <i>CD206</i>                    | CTCTGTTTACGCTATTGGACGC  | CGGAATTTCTGGGATTCAGCTTC |
| <i>CD11c</i>                    | CTGGATAGCCTTTCTTCTGCTG  | GCACACTGTGTCCGAATC      |
| <i>Arg1</i>                     | CTGGATAGCCTTTCTTCTGCTG  | ATGGAAGAGACCTTCAGCTAC   |
| <i>CCL17</i>                    | CCCATGAAGACCTTCACCTC    | CATCCCTGGAACACTCCACT    |
| <i>IL1<math>\beta</math></i>    | GTGTGGATCCAAAGCAATAC    | GTCTGCTCATTCATGACAAG    |
| <i>iNOS</i>                     | AGGAACCTACCAGCTCACTCTG  | TTTCTGTGCTGTGCTACAGTT   |
| <i>IL10</i>                     | AGAAAAGAGAGCTCCATCATGC  | TTATTGTCTTCCCGGCTGTACT  |
| <i>TNF-<math>\alpha</math></i>  | CTGTAGCCCACGTCGTAGC     | TTGAGATCCATGCCGTTG      |
| <i>STAT1</i>                    | TCACAGTGGTTCGAGCTTCAG   | GCAAACGAGACATCATAGGCA   |
| <i>STAT6</i>                    | CTCTGTGGGCCTAATTCCA     | CATCTGAACCGACCAGGAAT    |
| <i>TGF<math>\beta</math></i>    | CTCCCGTGGCTTCTAGTGC     | GCCTTAGTTTGGACAGGATCTG  |
| <i>Activin A</i>                | TGAGAGGATTTCTGTTGGCAAG  | TGACATCGGGTCTCTTCTTCA   |
| <i>SnoN</i>                     | AATAAAAAGCTGAACGGCATGGA | GGGTTTTCCCATTTGGCATGAAT |
| <i>18 S rRNA</i>                | ACCGCAGCTAGGAATAATGGA   | GCCTCAGTCCGAAAACCA      |
| <i>GAPDH</i>                    | GGTCCTCAGTGTAGCCCAAG    | AATGTGTCCGTCGTGGATCT    |
| <i><math>\beta</math>-actin</i> | CCAACCGTGAAAAGATGACC    | CCATCACAAATGCCTGTGGTA   |
